# Supplementary material for: PMP22 Regulates Self-Renewal and Chemoresistance of Gastric Cancer Cells
Source: Oxford University Press journal article supplement (doi:10.1158/1535-7163.mct-16-0750), 2017-03-23
Supplement: 15357163mct160750-sup-174334_2_supp_3888917_sm62yz.docx [file 15357163mct160750-sup-174334_2_supp_3888917_sm62yz.docx]

**Table S1 The protein expression profiles of the third passage DDP treated xenografts versus the 0.9% NaCl treated controls（fold change≥2）**

| **Name** | **CNTRL** | **TREAT** | **RATIO** |
| --- | --- | --- | --- |
| **PMP22** | **2.93** | **15.21** | **5.19** |
| **IL-3** | **0.84** | **2.84** | **3.38** |
| **DJ-1** | **0.62** | **2.02** | **3.27** |
| **CLAUDIN 7** | **0.57** | **1.61** | **2.82** |
| **6-Histidine** | **1.49** | **4.09** | **2.74** |
| **CDK2** | **0.55** | **1.50** | **2.72** |
| **Keratin 15** | **8.94** | **23.59** | **2.64** |
| **Chk1** | **19.46** | **50.53** | **2.60** |
| **Gai1** | **36.7** | **94.3** | **2.57** |
| **G-CSF** | **0.58** | **1.47** | **2.53** |
| **Involucrin** | **1.38** | **3.42** | **2.48** |
| **CREB-Binding Protein** | **4.05** | **9.96** | **2.46** |
| **GM-CSF** | **0.52** | **1.25** | **2.40** |
| **CA19-9** | **0.53** | **1.25** | **2.36** |
| **RAS** | **0.75** | **1.66** | **2.21** |
| **Paxillin** | **5.02** | **10.88** | **2.17** |
| **SRC1 (Steroid Receptor Coactivator-1) Ab-1** | **1** | **2.16** | **2.16** |
| **IRAK** | **10.16** | **21.71** | **2.14** |
| **p16INK4a** | **0.65** | **1.36** | **2.09** |
| **S100** | **0.8** | **1.65** | **2.06** |
| **I-Kappa-B Kinase b (IKKb)** | **1.58** | **3.25** | **2.06** |
| **Keratin 10/13** | **2.89** | **5.92** | **2.05** |
| **Keratin, LMW** | **0.78** | **1.59** | **2.04** |
| **CD57** | **0.87** | **1.76** | **2.02** |
| **IPO-38 Proliferation Marker** | **1.24** | **2.49** | **2.01** |
| **Glucose-Regulated Protein 94** | **0.77** | **1.54** | **2.00** |
| **Parathyroid Hormone Receptor Type 1** | **4.22** | **2.13** | **0.50** |
| **FSH** | **5.54** | **2.78** | **0.50** |
| **Tropomyosin** | **2.09** | **1.05** | **0.50** |
| **PCNA** | **3.78** | **1.84** | **0.49** |
| **Ruv C** | **2.69** | **1.31** | **0.49** |
| **Retinoic Acid Receptor (b)** | **7.49** | **3.56** | **0.48** |
| **Grb2** | **7.73** | **3.66** | **0.47** |
| **CD50/ICAM-3** | **15.92** | **7.50** | **0.47** |
| **HPV 16** | **35.85** | **16.80** | **0.47** |
| **p35nck5a** | **2.59** | **1.20** | **0.47** |
| **Keratin 10** | **2.59** | **1.16** | **0.45** |
| **B-Cell** | **4.30** | **1.92** | **0.45** |
| **Adenovirus Fiber** | **19.77** | **8.71** | **0.44** |
| **ADP-ribosylation Factor (ARF-6)** | **7.84** | **3.40** | **0.43** |
| **CD10** | **4.93** | **2.12** | **0.43** |
| **CD6** | **11.23** | **4.80** | **0.43** |
| **MMP-13 (Collagenase-3)** | **4.53** | **1.94** | **0.43** |
| **Neuron Specific Enolase** | **46.19** | **19.55** | **0.42** |
| **Human Sodium Iodide Symporter (hNIS)** | **5.35** | **2.24** | **0.42** |
| **Keratin 8** | **48.79** | **19.27** | **0.39** |
| **PLAP** | **2.69** | **1.04** | **0.39** |
| **CXCR4 / Fusin** | **7.86** | **3.04** | **0.39** |
| **CDC6** | **2.35** | **0.90** | **0.38** |
| **CD14** | **4.16** | **1.49** | **0.36** |
| **Collagen II** | **3.73** | **1.30** | **0.35** |
| **Progesterone Receptor (phospho-specific) - Serine 190** | **19.66** | **6.67** | **0.34** |
| **Filamin** | **8.25** | **2.70** | **0.33** |
| **Estradiol** | **4.06** | **1.32** | **0.33** |
| **XRCC1** | **4.79** | **1.50** | **0.31** |
| **Epithelial Specific Antigen** | **8.40** | **2.62** | **0.31** |
| **Keratin 5/6/18** | **3.42** | **1.04** | **0.30** |
| **Keratin, Multi** | **28.27** | **8.01** | **0.28** |
| **CD43** | **33.20** | **8.75** | **0.26** |
| **SHP-1** | **4.62** | **1.20** | **0.26** |
| **Keratin 5/8** | **8.13** | **2.09** | **0.26** |
| **MHC-II-(HLA-DP-and-DR)-** | **24.74** | **6.19** | **0.25** |
| **Histone H1** | **10.96** | **2.79** | **0.25** |
| **Exo1** | **5.40** | **1.30** | **0.24** |
| **Adenovirus** | **9.36** | **2.13** | **0.23** |
| **p73a** | **5.08** | **1.03** | **0.20** |
| **CD56/NCAM-1** | **12.30** | **2.28** | **0.19** |
| **GnRH Receptor** | **4.54** | **0.84** | **0.18** |
| **CD16** | **15.74** | **2.72** | **0.17** |
| **Moesin** | **20.94** | **3.48** | **0.17** |
| **ERCC1** | **18.41** | **2.44** | **0.13** |
| **MAP1B** | **33.57** | **3.31** | **0.10** |
